# Supplementary material for: Sulfur/carbon cathode material chemistry and morphology optimisation for lithium–sulfur batteries
Source: Royal Society of Chemistry journal article supplement (doi:10.1039/d4ra04740k), 2024-01-01
Supplement: d4ra04740k1.pdf [file d4ra04740k1.pdf]

Supporting Information

## **Sulfur/Carbon Cathode Material Chemistry and Morphology Optimisation for Lithium-Sulfur Batteries**

Tayeba Safdar<sup>[a,b]</sup> and Chun Huang<sup>\*[a,b,c]</sup>

<sup>[a]</sup> T. Safdar, Dr C. Huang

Department of Materials

Imperial College London

London SW7 2AZ, UK; E-mail: [a.huang@imperial.ac.uk](mailto:a.huang@imperial.ac.uk).

<sup>[b]</sup> T. Safdar, Dr C. Huang

The Faraday Institution

Quad one, Becquerel Ave, Harwell Campus, Didcot, OX11 0RA, UK

<sup>[c]</sup> Dr C. Huang

Research Complex at Harwell

Rutherford Appleton Laboratory

Didcot, OX11 0FA, UK

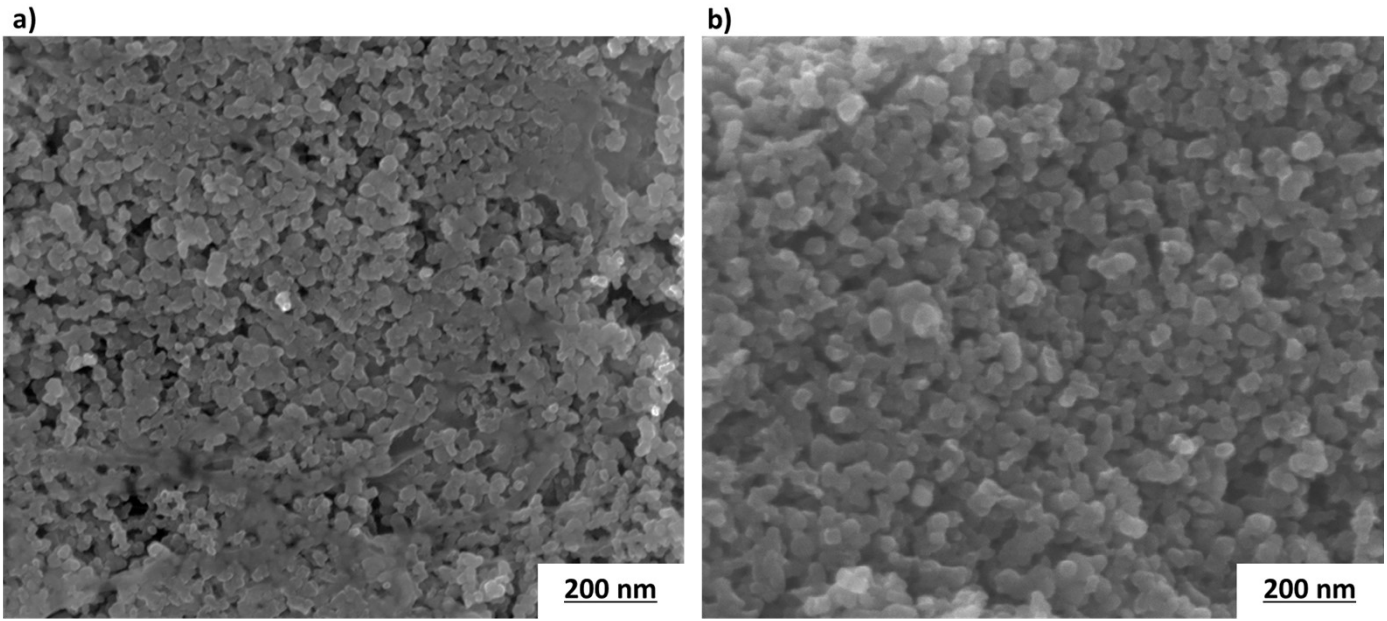

Figure S1. : a) TC10.5 cathode surface SEM image at 200nm; b) TC10.5 S/C composite powder surface SEM at 200nm

| Sample | Mass concentration<br>% ( $\pm 40 - 60\%$ ) | Atomic concentration<br>% ( $\pm 40 - 60\%$ ) | Mass concentration<br>% ( $\pm 53 - 60\%$ ) | Atomic concentration<br>% ( $\pm 53 - 60\%$ ) |
|--------|---------------------------------------------|-----------------------------------------------|---------------------------------------------|-----------------------------------------------|
|--------|---------------------------------------------|-----------------------------------------------|---------------------------------------------|-----------------------------------------------|

|             | Sulfur |      | Carbon |      |
|-------------|--------|------|--------|------|
| <b>SC10</b> | 35.4   | 17.0 | 64.6   | 83.0 |
| <b>SC30</b> | 26.9   | 12.1 | 73.1   | 87.9 |
| <b>SC50</b> | 23.1   | 10.1 | 76.9   | 89.9 |
| <b>SC70</b> | 34.4   | 16.4 | 65.6   | 83.6 |
| <b>SC90</b> | 35.7   | 17.2 | 64.3   | 82.8 |

**Table ST1:** EDX atomic and mass % across different cathode samples

## BET Isotherms

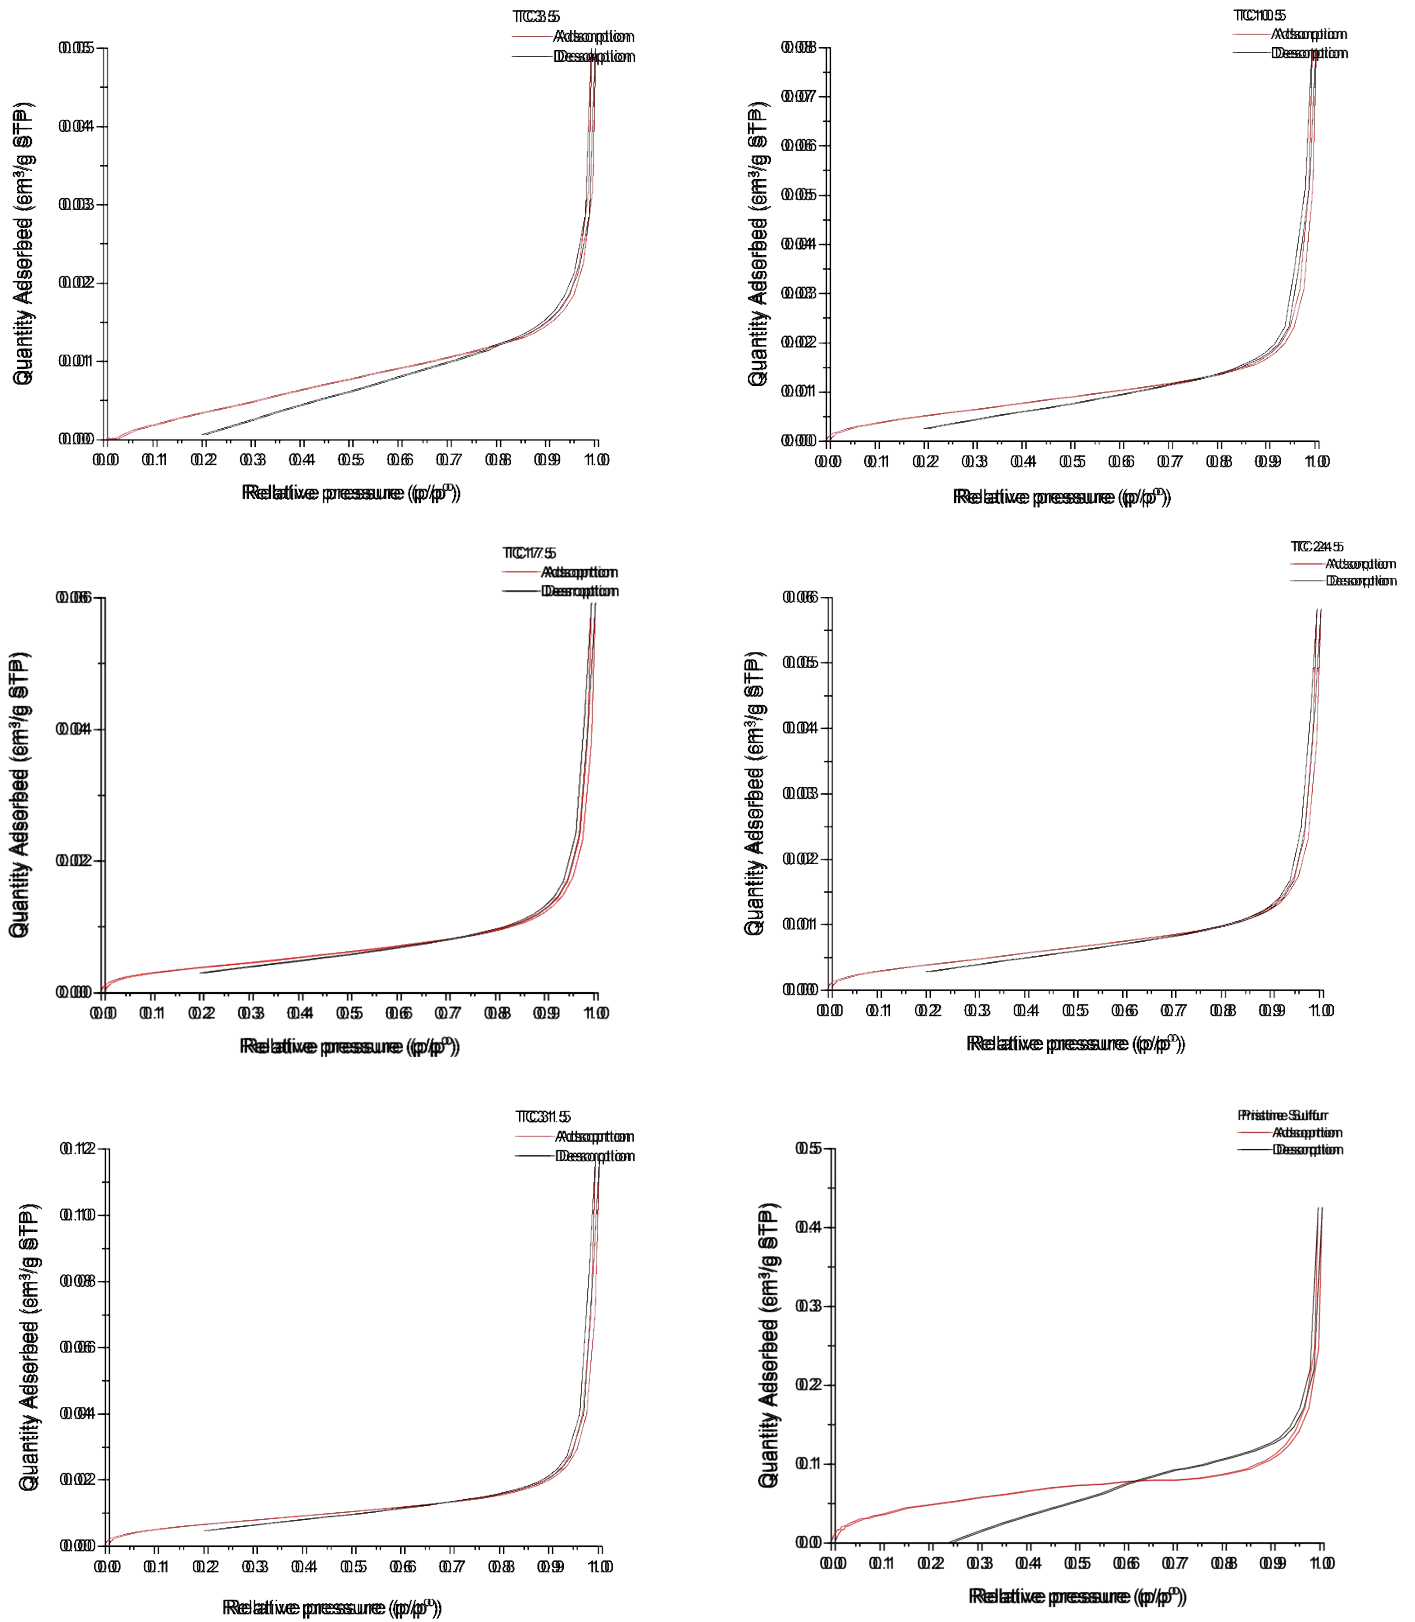

Figure S2: Adsorption and desorption isotherms for all TC sample and pristine sulfur

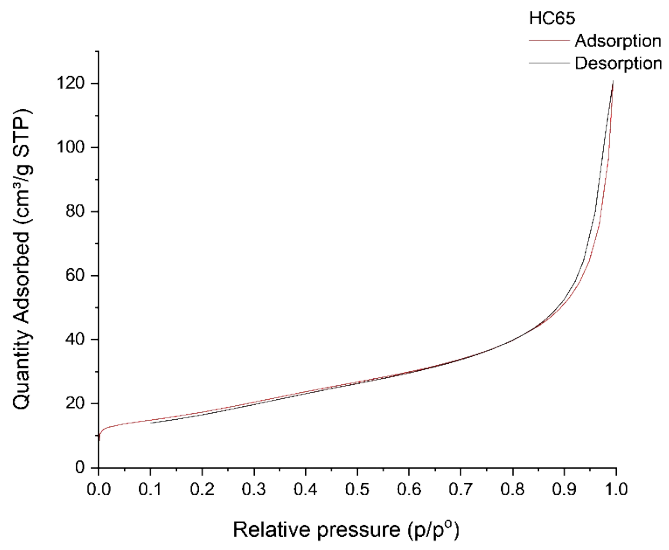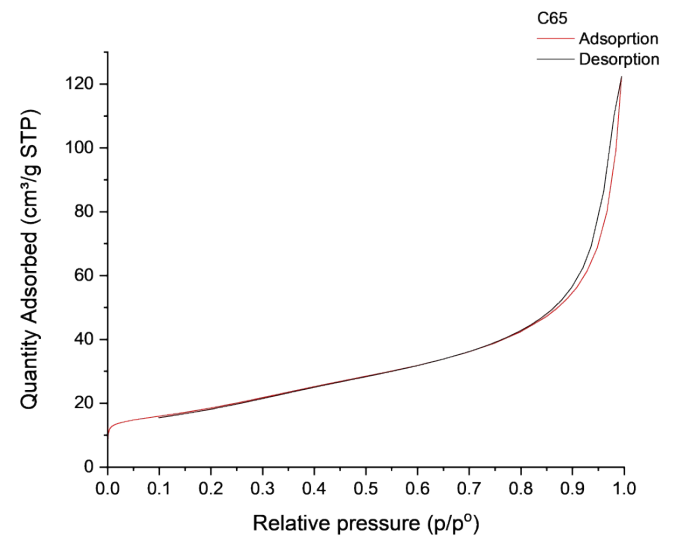

Figure S3: Adsorption and desorption isotherm for heated C65 and pristine C65

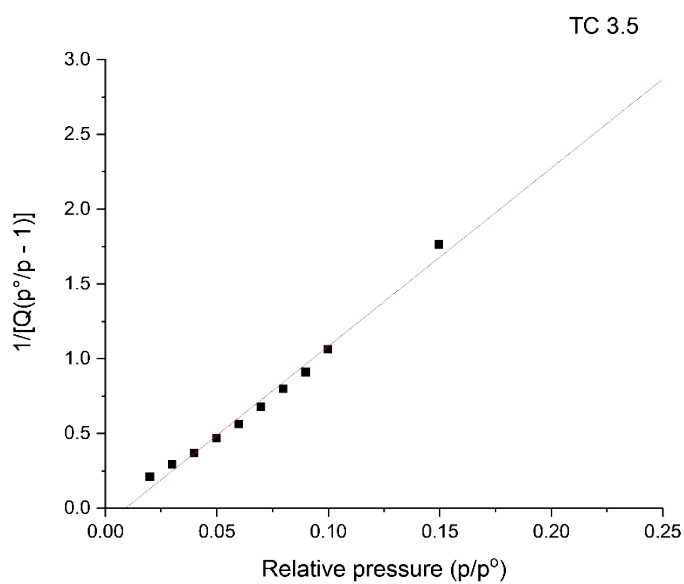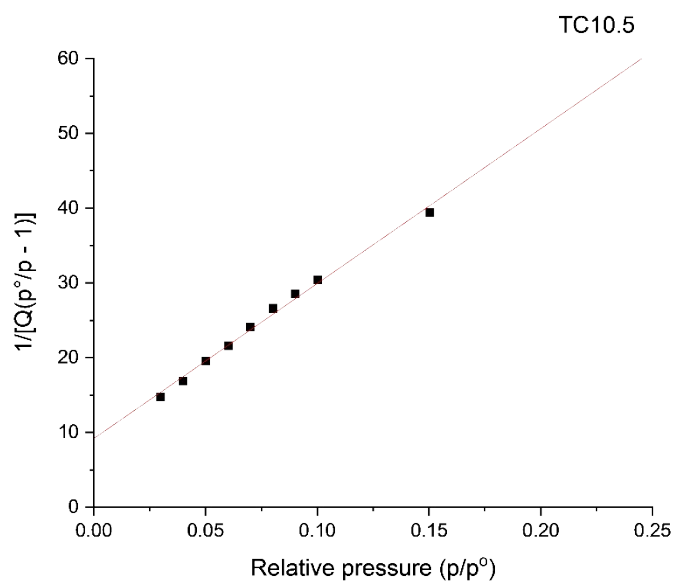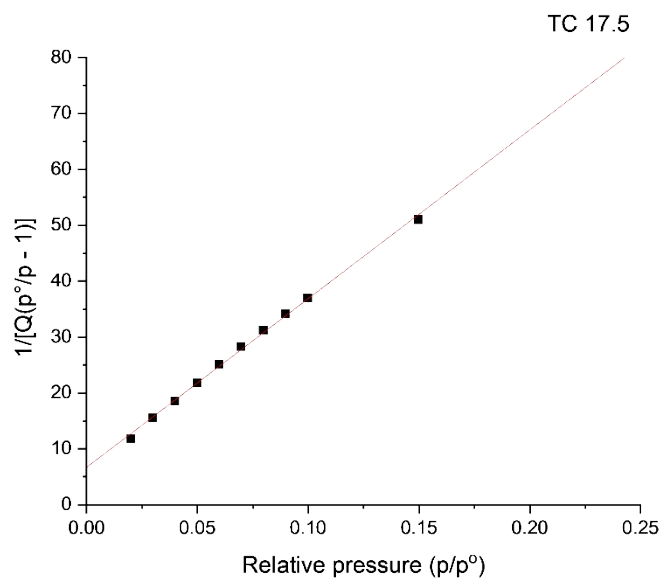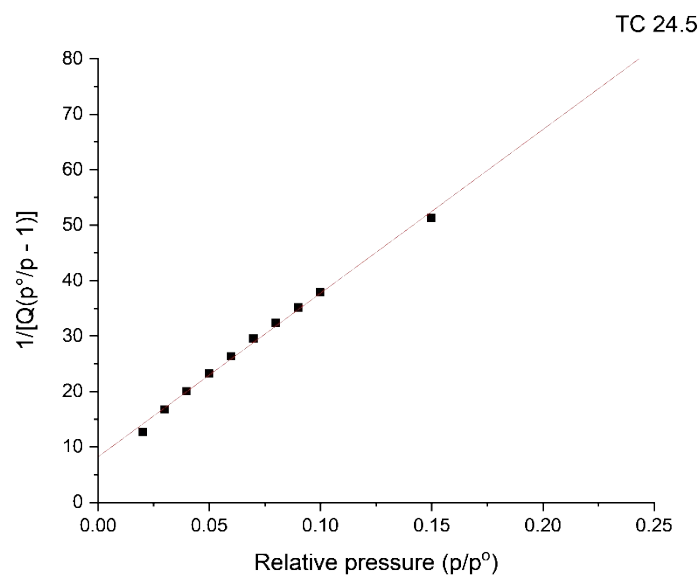

Figure S4: BET surface area plots for TC3.5, 10.5, 17.5 and 24.5

**BET surface area plot**

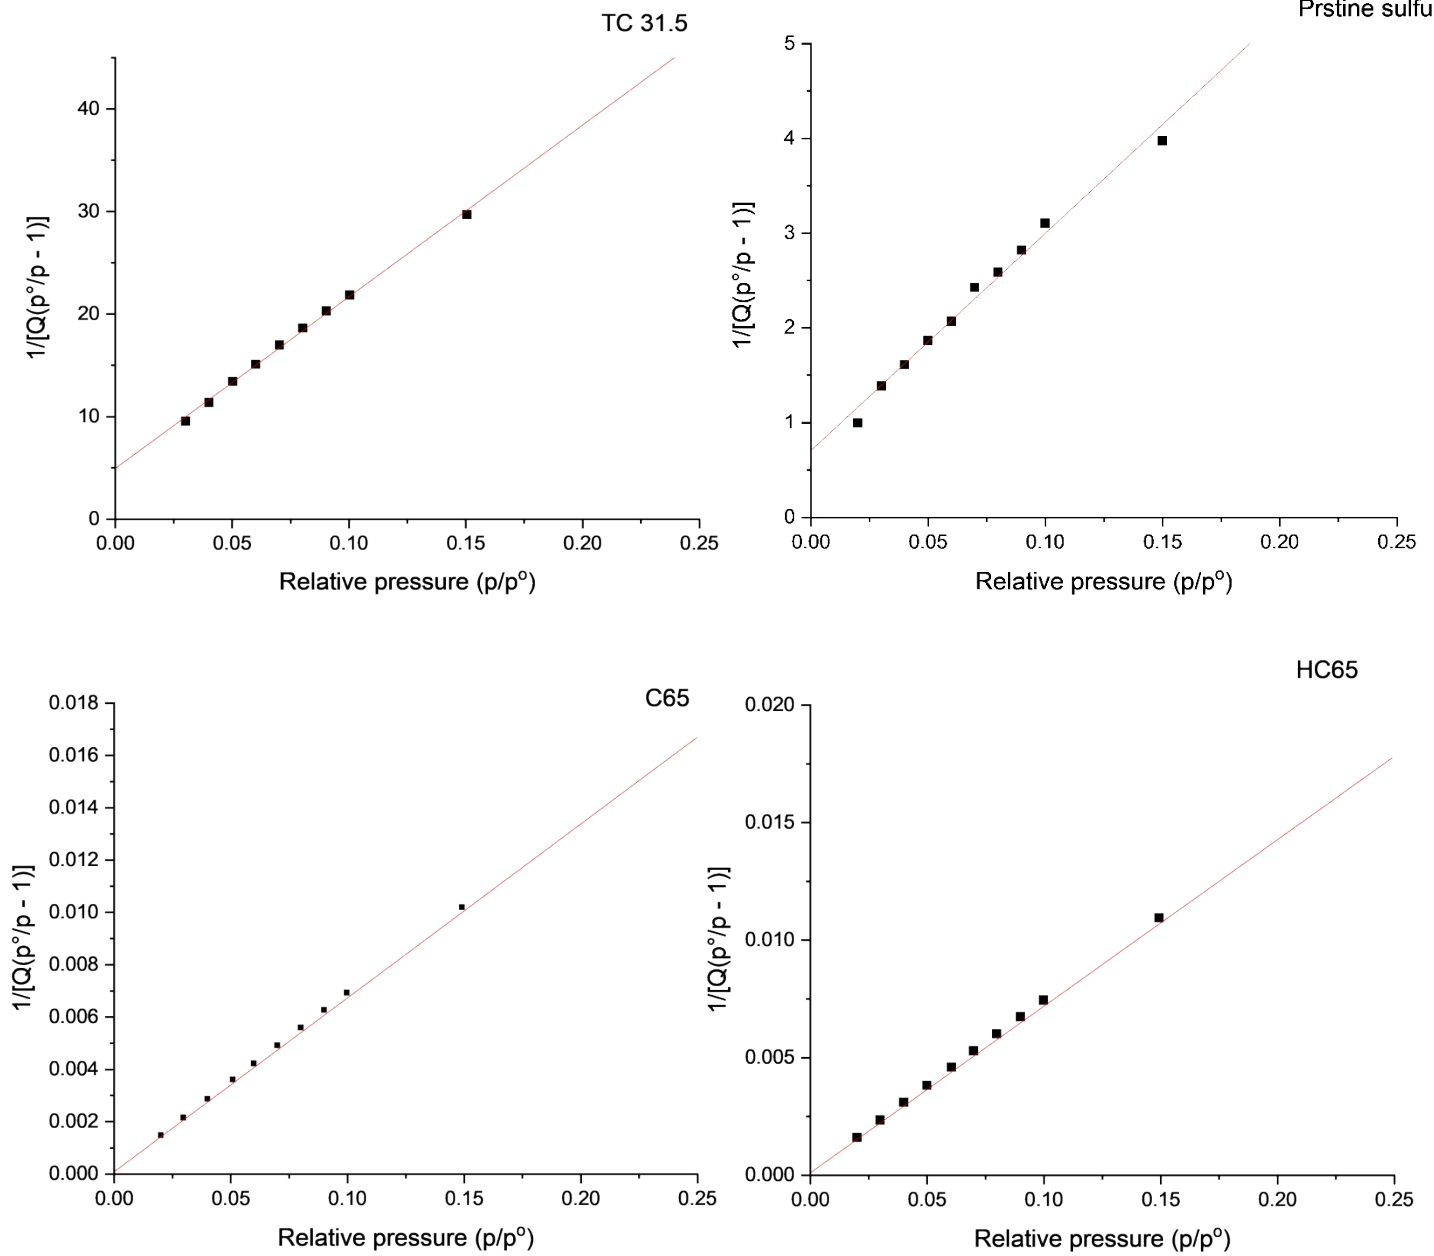

Figure S5: BET surface area plots for TC31.5, pristine sulfur, pristine C65 and HC65

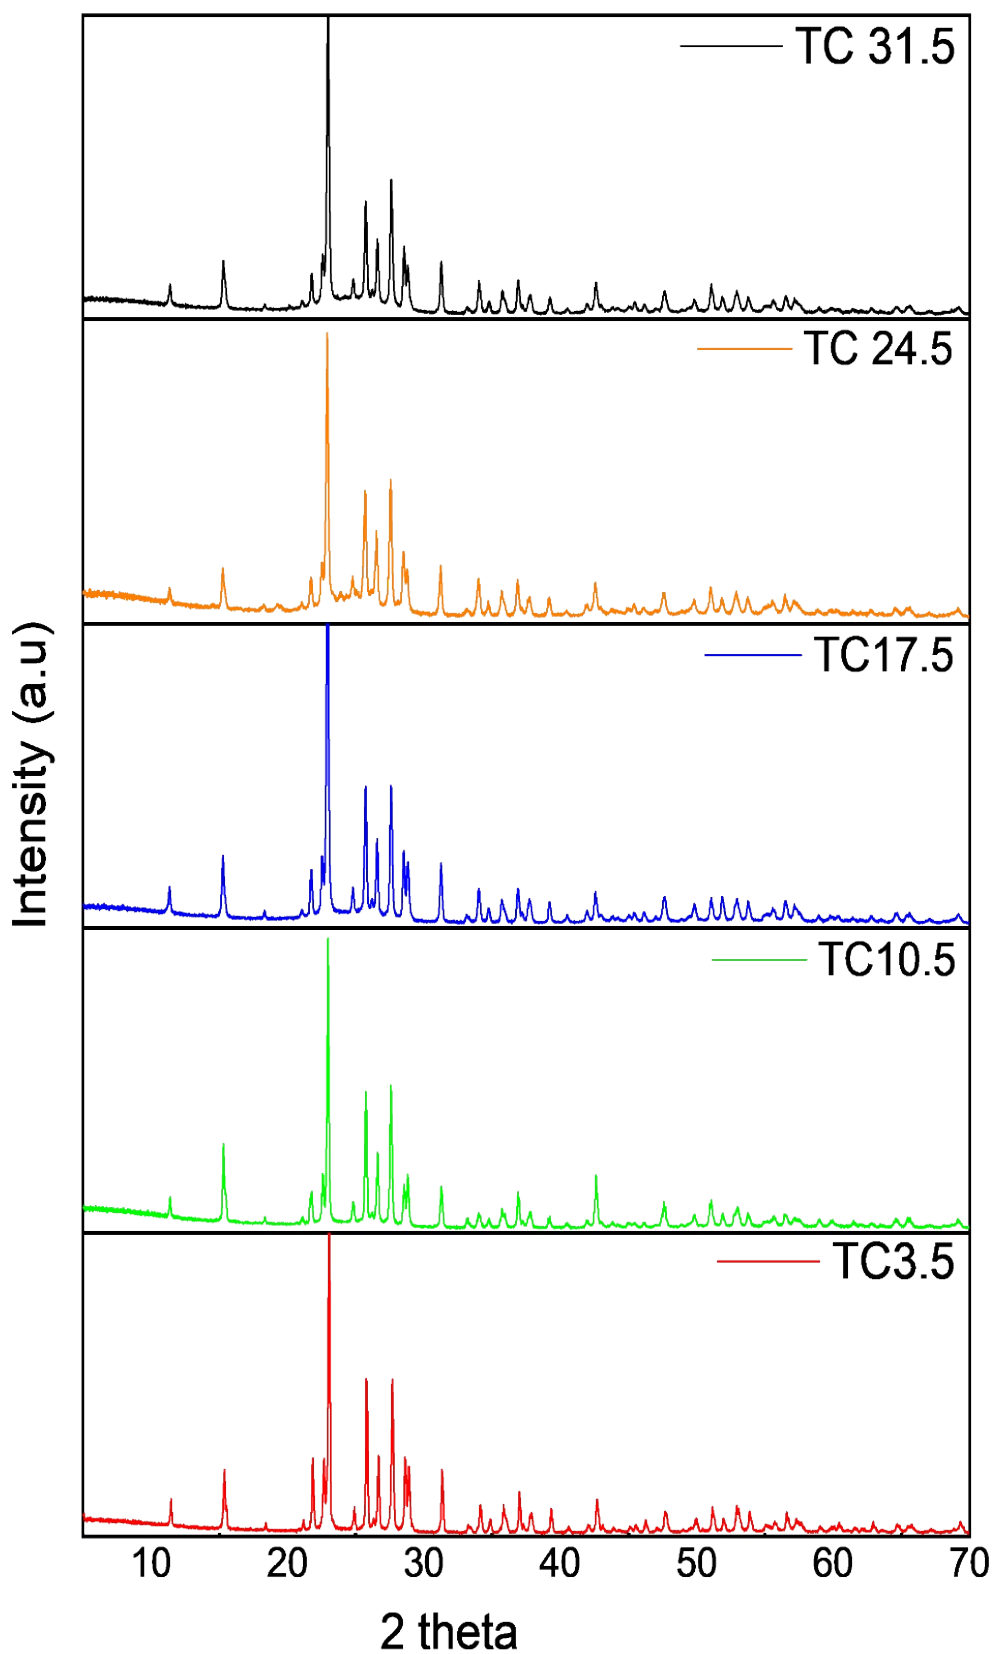

Figure S6: XRD pattern of TC cathode films



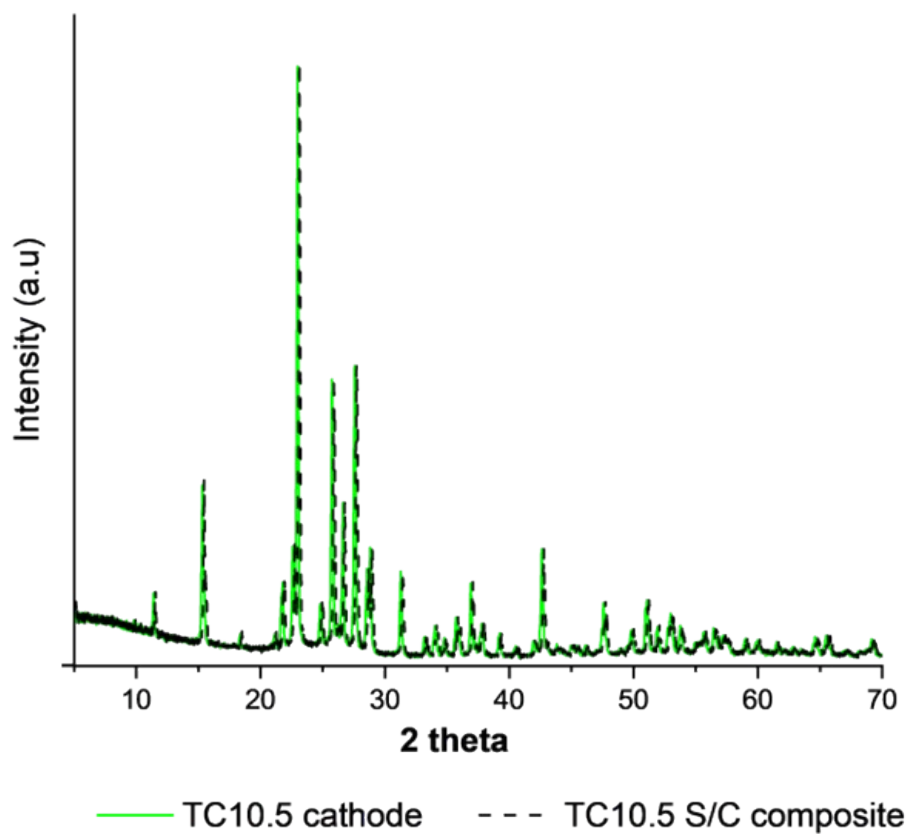

Figure S7: XRD pattern of TC10.5 cathode film with TC10.5 S/C composite

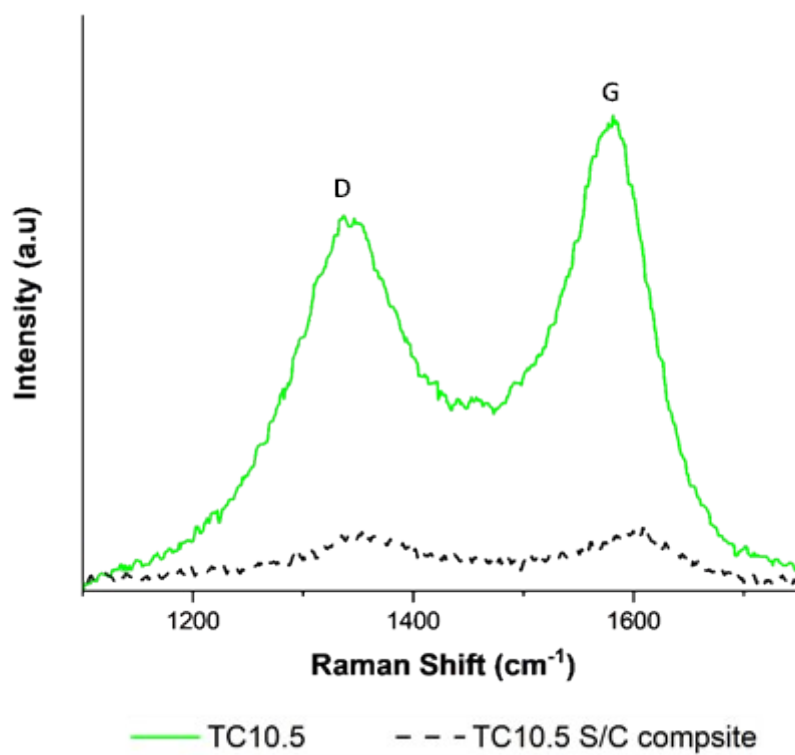

Figure S8: Raman D and G peaks pattern of TC10.5 cathode film with TC10.5 S/C composite

# XPS C1s and Sp2 Spectra

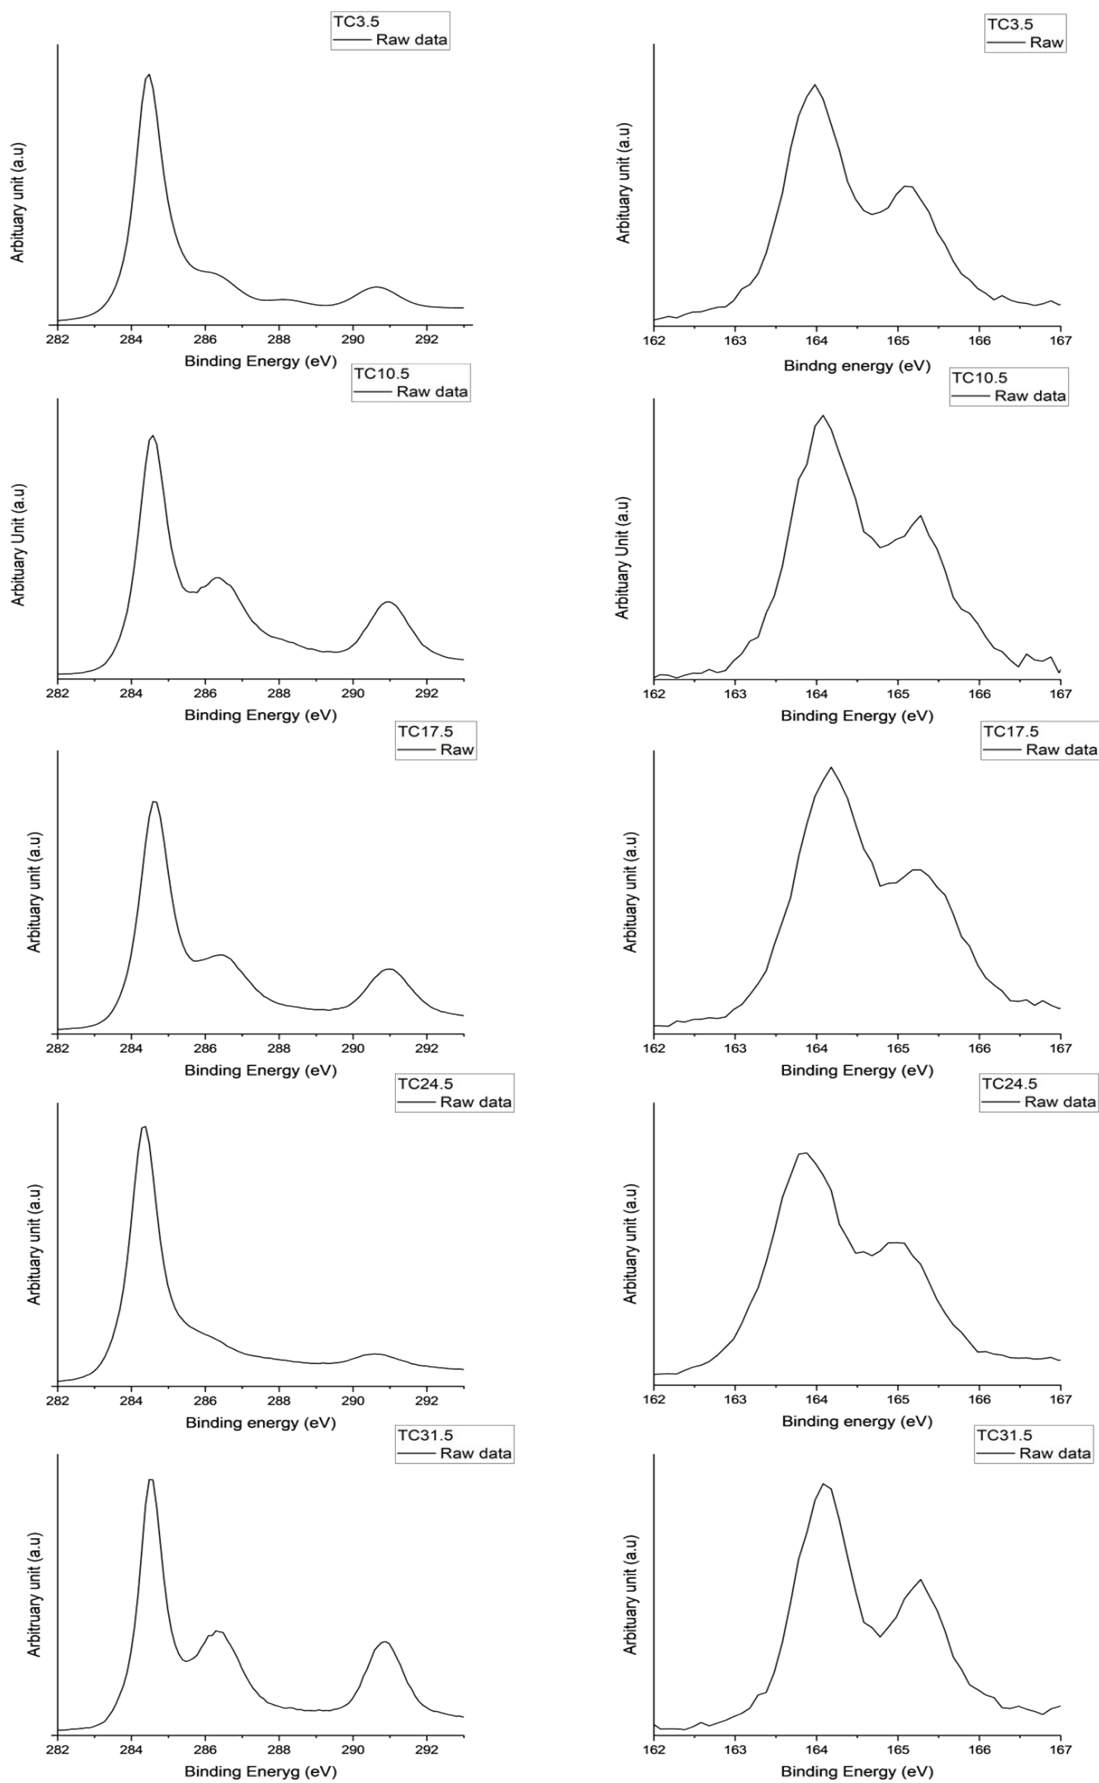

Figure S9a: C1s and S2p raw spectra for TC3.5, 10.5, 17.5, 24.5 and 31.5

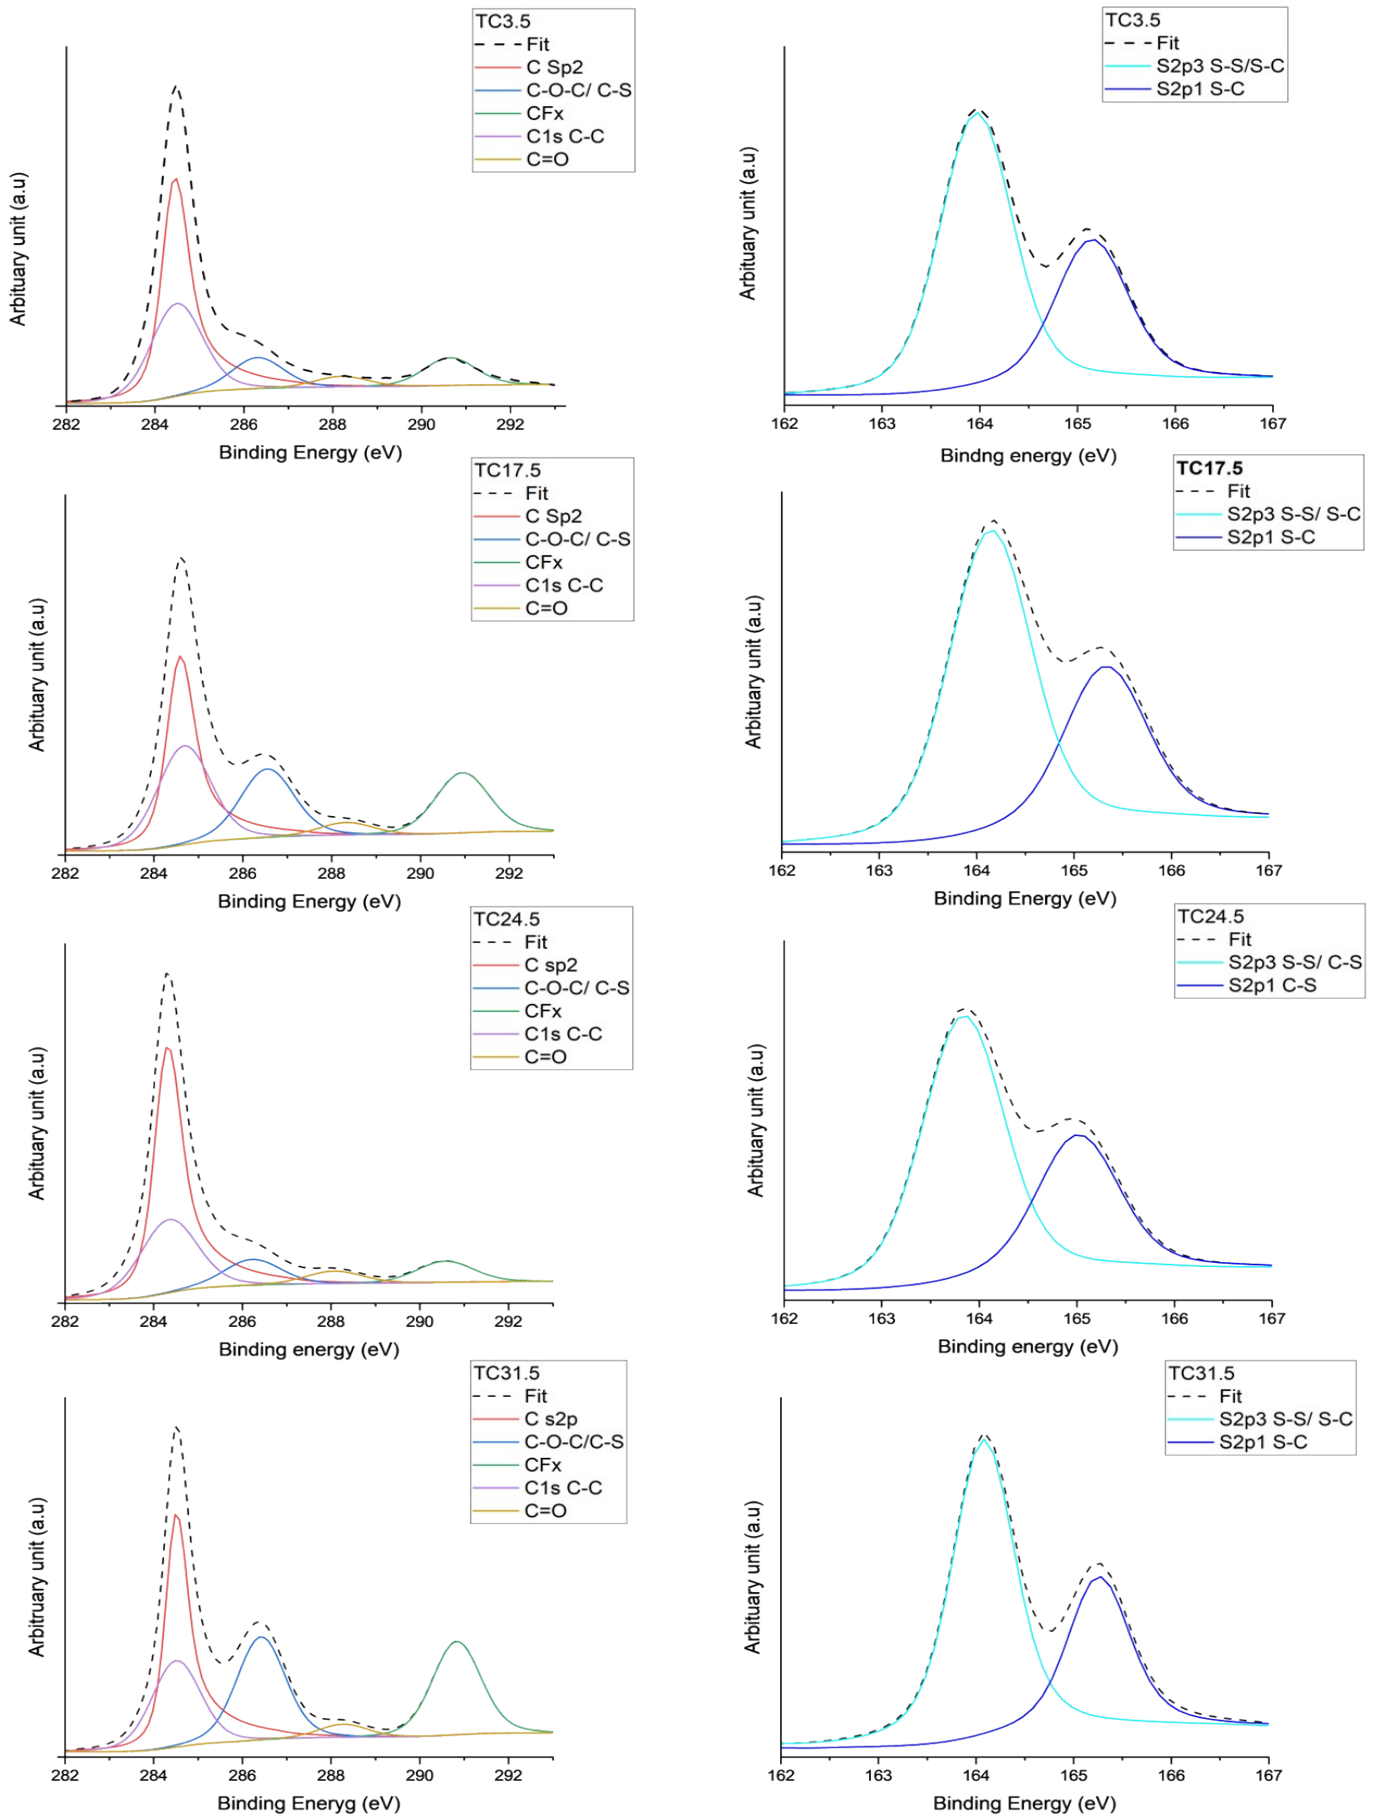

Figure S9b: C1s and S2p fitted spectra for TC3.5, 10.5, 17.5, 24.5 and 31.5

# XPS O1s spectrum

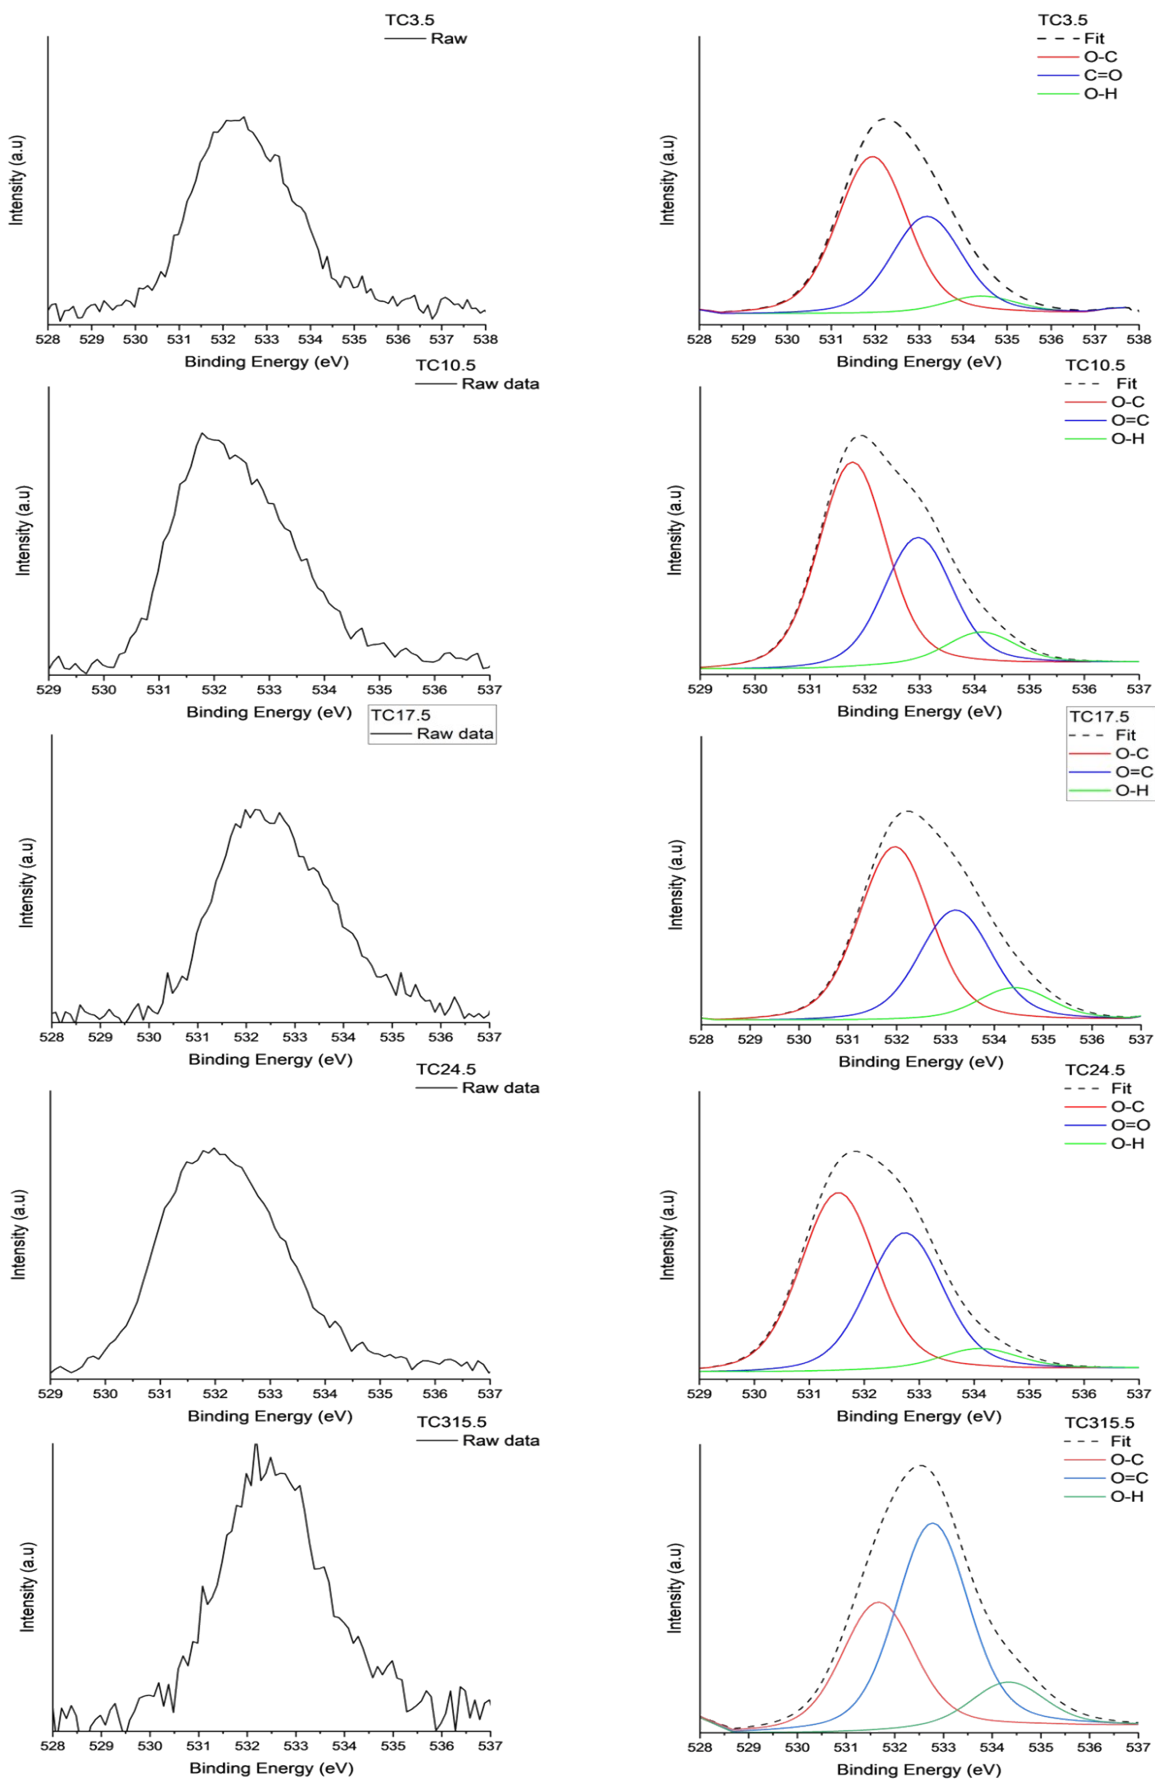

Figure S10: O1s raw and fitted spectra for all TC samples

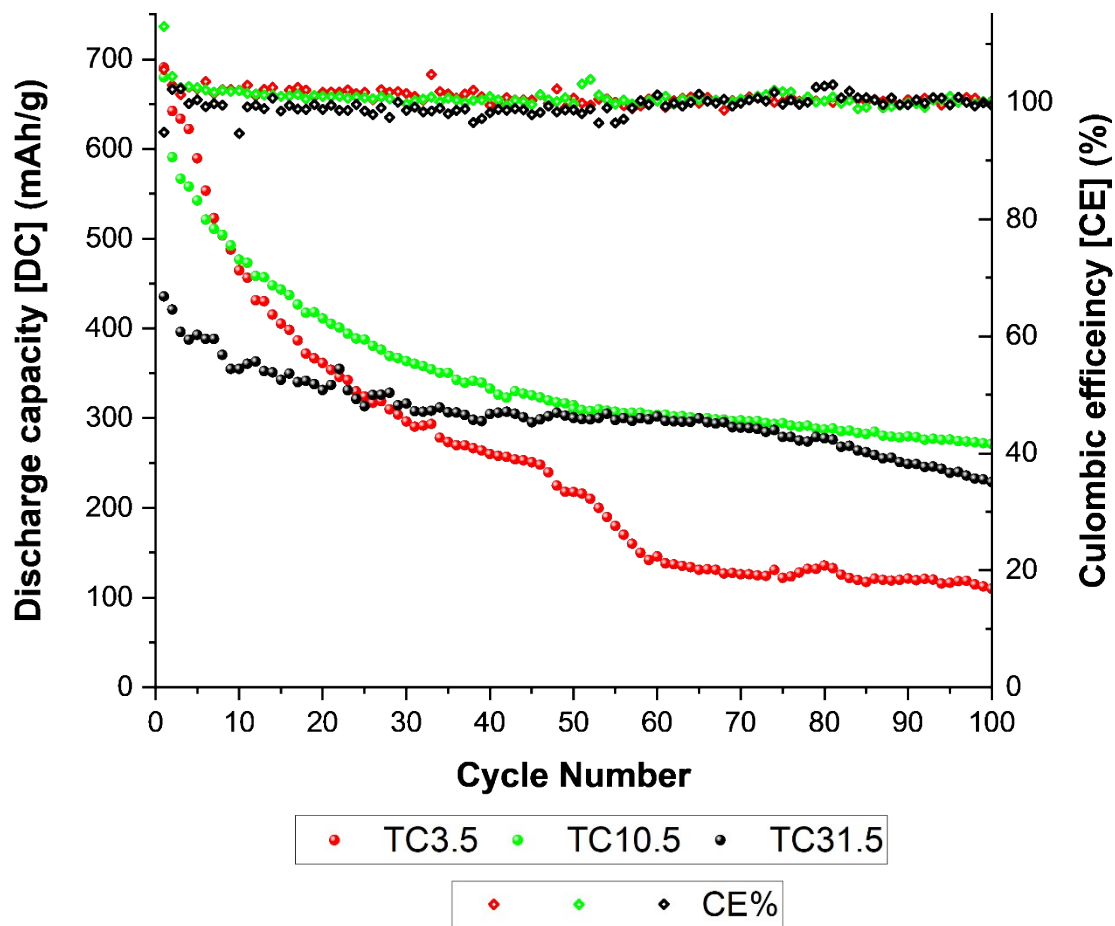

Figure S11: Discharge capacity and coulombic efficiency after 100 cycles

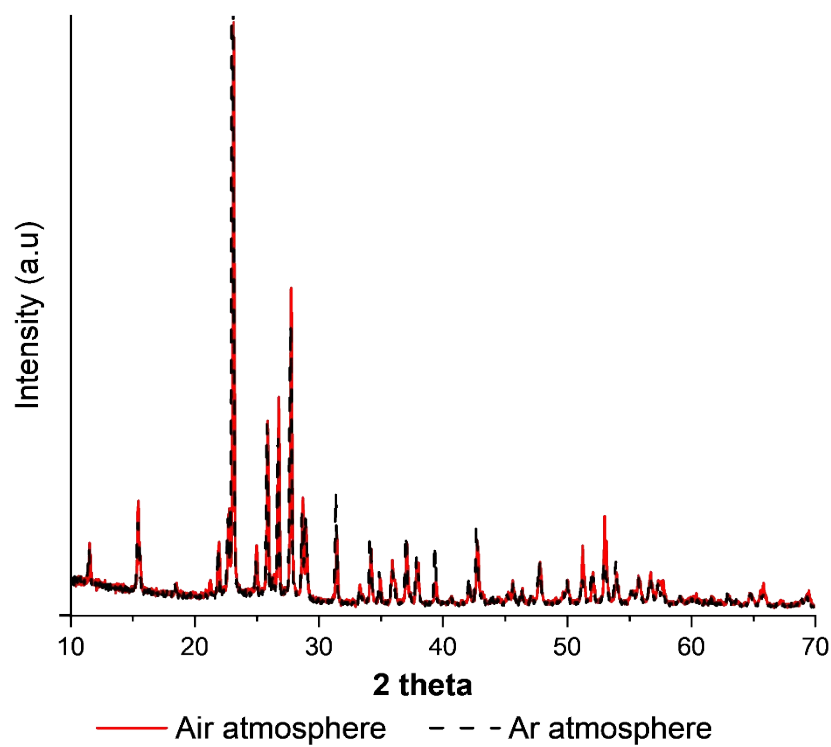

Figure S12: XRD pattern of TC composite milled in Ar and air atmosphere

**Table ST2:** Electronic conductivities of All TC cathode samples. C65 carbon black and heated C65 carbon black

| <b>Sample</b>       | <b><math>\sigma = (1/R_{\text{eff}})*(d/A)</math> (S/m)</b> |
|---------------------|-------------------------------------------------------------|
| <b>TC3.5</b>        | 1.77E-03                                                    |
| <b>TC10.5</b>       | 2.15E-03                                                    |
| <b>TC17.5</b>       | 3.00E-03                                                    |
| <b>TC24.5</b>       | 3.08E-03                                                    |
| <b>TC31.5</b>       | 4.34E-03                                                    |
| <b>HC65</b>         | 5.10E-01                                                    |
| <b>Pristine C65</b> | 1.08E-01                                                    |
